# Supplementary material for: Type 3 innate lymphoid cells maintain intestinal epithelial stem cells after tissue damage
Source: PubMed Central journal article supplement — J Exp Med. 2015 Oct 19;212(11):1783–91. doi: 10.1084/jem.20150318 (PMC4612094; doi:10.1084/jem.20150318), 2015-10-19
Supplement: supp_jem.20150318_JEM_20150318_sm.pdf [file supp_jem.20150318_JEM_20150318_sm.pdf]

## SUPPLEMENTAL MATERIAL

Aparicio-Domingo et al., <http://www.jem.org/cgi/content/full/jem.20150318/DC1>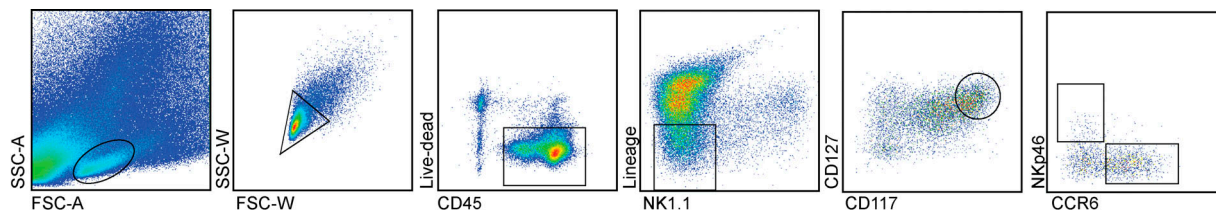

Figure S1. Gating strategy for the isolation of ILC3s from small intestinal lamina propria.

Table S1. Primer sequences used for qPCR

| Gene                 | Forward primer            | Reverse primer            |
|----------------------|---------------------------|---------------------------|
| <i>Gapdh</i>         | 5'-TCAACGGCACAGTCAAG-3'   | 5'-GCTCCACCCTTCAAGTG-3'   |
| <i>Socs3</i>         | 5'-GGAGCCCTTTGTAGACT-3'   | 5'-CGGAAACTTGCTGTG-3'     |
| <i>Il22</i>          | 5'-CTCCCCAGTCAGACAG-3'    | 5'-CAATCGCCTTGATCTCTC-3'  |
| <i>Csf2 (Gm-csf)</i> | 5'-GACCCGCTGAAGATATT-3'   | 5'-ATCCGCATAGGTGTAAGT-3'  |
| <i>Tnf (Tnfa)</i>    | 5'-GGGGGCTTCCAGAACT-3'    | 5'-GGCCATAGAAGTATGAG-3'   |
| <i>Ncr1 (NKp46)</i>  | 5'-CCCCCTGAAACTGGTAGTA-3' | 5'-GTGGCAGTCTTCAGTTGG-3'  |
| <i>Il17</i>          | 5'-CTTGGCGAAAAGTGA-3'     | 5'-TTGCTGGATGAGAACAGAA-3' |
| <i>Ifng</i>          | 5'-CAAAGGATGGTGACATGA-3'  | 5'-GGGTTGTTGACCTCAAAGT-3' |
| <i>Rorc</i>          | 5'-GTGGGGACAAGTCATCTG-3'  | 5'-CGGCCAAACTTGACAG-3'    |
| <i>Ltb</i>           | 5'-ACGTCGGGTTGAGAAGA-3'   | 5'-GGATGTGGAGGCTAGATTC-3' |
| <i>Bax</i>           | 5'-AAGGCCTGTGCACTAA-3'    | 5'-GAGGCGGTGAGGACTC-3'    |
| <i>Bcl2l1 (Bclx)</i> | 5'-CGTGGCCTTTTCTCC-3'     | 5'-GGCTGCTGCATTGTTCC-3'   |
| <i>Wnt5a</i>         | 5'-CGTGGACGCTAGAGAAAG-3'  | 5'-AGCCAGAACTCCATGAC-3'   |
